# Supplementary material for: Timescales of magmatic processes during the eruptive cycle 2014–2015 at Piton de la Fournaise, La Réunion, obtained from Mg–Fe diffusion modelling in olivine
Source: Springer Nature journal article supplement (doi:10.1007/s00410-019-1642-y), 2019-11-16
Supplement: MOESM3 [file 410_2019_1642_MOESM3_ESM.xlsx]

## Sheet: REU 140624-12
Online Resource 3: Parameters of diffusion modelling					Timescales of magmatic processes during the eruptive cycle 2014-2015 at Piton de la Fournaise, La Réunion, obtained from Mg-Fe diffusion modelling in olivine												Diffusion modelling was done with the DIPRA software (Girona & Costa 2013)
					Contributions to Mineralogy and Petrology												Dx = spatial steps
					Caren Sundermeyer*, Andrea Di Muro, Boris Gordeychik, and Gerhard Wörner												Dt = time steps
					* Corresponding author: csunder@gwdg.de												Discrepancy = goodness of fit
																	Date of reactivation = Date of eruption - diffusion time
			Input parameters				Modelling parameters			Results							* min. diffusion time along c-axis
Crystal No.	Fo initial	Fo boundary		Angles to crystallographic axes		Dx	Iterations	Dt	Time	Uncertainty		Discrepancy	Date of
	mol	mol	a	b	c	micron		seconds	days	-	+		Reactivation
140624-12-1	0.821	0.831	90	90	0	4.99445	1800	90000	1330	260	307	2	29.10.2010*
140624-12-2	0.849	0.809	90	90	0	4.00321	700	50000	43	11	6	6	09.05.2014*
140624-12-3	0.8455	0.81	90	90	0	3.95767	500	50000	23	4	6	10	30.05.2014*
140624-12-4	0.838	0.808	16.5	81.1	76.3	4.02616	400	40000	63	9	9	13	2014-04-19
140624-12-5	0.84	0.813	90	90	0	4.0687	400	20000	10	2	2	15	11.06.2014*
140624-12-6	0.842	0.811	90	90	0	4.11102	400	20000	4	1	1	8	17.06.2014*
140624-12-7	0.8415	0.812	90	90	0	4.0703	400	20000	6	2	1	0	15.06.2014*
140624-12-8	0.8415	0.822	60.8	38.1	67.8	1.98276	400	40000	5	2	4	8	2014-06-16
140624-12-10	0.846	0.812	90	90	0	4.17798	400	20000	17	2	4	0	04.06.2014*

## Sheet: REU 150731-1
Online Resource 3: Parameters of diffusion modelling					Timescales of magmatic processes during the eruptive cycle 2014-2015 at Piton de la Fournaise, La Réunion, obtained from Mg-Fe diffusion modelling in olivine												Diffusion modelling was done with the DIPRA software (Girona & Costa 2013)
					Contributions to Mineralogy and Petrology												Dx = spatial steps
					Caren Sundermeyer*, Andrea Di Muro, Boris Gordeychik, and Gerhard Wörner												Dt = time steps
					* Corresponding author: csunder@gwdg.de												Discrepancy = goodness of fit
																	Date of reactivation = Date of eruption - diffusion time
			Input parameters				Modelling parameters			Results							* min. diffusion time along c-axis
Crystal No.	Fo initial	Fo boundary		Angles to crystallographic axes		Dx	Iterations	Dt	Time	Uncertainty		Discrepancy	Date of
	mol	mol	a	b	c	micron		seconds	days	-	+		Reactivation
150731-7-1	0.8435	0.804	52.5	55.6	56.2	2.99237	800	70000	430	95	69	7	2014-05-27
150731-7-2	0.844	0.808	63.4	84.5	27.3	3	200	40000	62	13	9	4	2015-05-31
150731-7-4	0.8365	0.808	85.1	24.9	114.3	3.02	900	70000	547	67	96	7	2014-01-31
150731-7-5	0.825	0.801	30.7	60.3	83	3.01538	900	70000	469	56	74	10	2014-04-18
150731-7-6	0.7905	0.802	24.2	90.5	114.2	5.04878	600	60000	78	19	21	15	2015-05-14

## Sheet: REU 150828-6
Online Resource 3: Parameters of diffusion modelling						Timescales of magmatic processes during the eruptive cycle 2014-2015 at Piton de la Fournaise, La Réunion, obtained from Mg-Fe diffusion modelling in olivine												Diffusion modelling was done with the DIPRA software (Girona & Costa 2013)
						Contributions to Mineralogy and Petrology												Dx = spatial steps
						Caren Sundermeyer*, Andrea Di Muro, Boris Gordeychik, and Gerhard Wörner												Dt = time steps
						* Corresponding author: csunder@gwdg.de												Discrepancy = goodness of fit
																		Date of reactivation = Date of eruption - diffusion time
				Input parameters				Modelling parameters			Results							* min. diffusion time along c-axis
Crystal No.	Fo initial	Fo outer core	Fo boundary		Angles to crystallographic axes		Dx	Iterations	Dt	Time	Uncertainty		Discrepancy	Date of
	mol	mol	mol	a	b	c	micron		seconds	days	-	+		Reactivation
150828-6-4	0.796	0.784	0.796	70	63.9	33.9	2.013	200	10000	1	0.3508	0.484	15	2015-08-27
150828-6-6	0.802	-	0.811	68.1	56.4	41.9	1.50109	600	10000	12.5	5	5	8	2015-08-15
150828-6-7	0.826	-	0.8099	70	63.9	33.9	3.07075	300	40000	20	9	12	0	2015-08-08

## Sheet: REU 150915-1
Online Resource 3: Parameters of diffusion modelling					Timescales of magmatic processes during the eruptive cycle 2014-2015 at Piton de la Fournaise, La Réunion, obtained from Mg-Fe diffusion modelling in olivine												Diffusion modelling was done with the DIPRA software (Girona & Costa 2013)
					Contributions to Mineralogy and Petrology												Dx = spatial steps
					Caren Sundermeyer*, Andrea Di Muro, Boris Gordeychik, and Gerhard Wörner												Dt = time steps
					* Corresponding author: csunder@gwdg.de												Discrepancy = goodness of fit
																	Date of reactivation = Date of eruption - diffusion time
			Input parameters				Modelling parameters			Results							* min. diffusion time along c-axis
Crystal No.	Fo initial	Fo boundary		Angles to crystallographic axes		Dx	Iterations	Dt	Time	Uncertainty		Discrepancy	Date of
	mol	mol	a	b	c	micron		seconds	days	-	+		Reactivation
150915-1-2	0.839	0.813	82.6	7.5	88.8	3.03704	700	70000	165	42	47	0	2015-04-03
150915-1-3	0.837	0.805	21.7	87	68.5	3.1	700	70000	49	12	8	8	2015-07-28
150915-1-6	0.797	0.816059	28.8	61.3	88	1.99286	700	70000	315	48	92	8	2014-11-04
150915-1-9	0.8475	0.819	55.1	37.3	78.6	1.98288	900	70000	579	72	104	0	2014-02-13
150915-1-10	0.8465	0.818	85.3	6.8	85	1.97893	900	70000	477	93	166	7	2014-05-26
150915-1-11	0.848	0.812	56.1	36.3	78.6	1.97525	1100	70000	548	116	141	6	2014-03-26
150915-1-13	0.8435	0.811	59.8	31.4	82.3	1.97964	1100	70000	473	61	66	11	2014-05-31
150915-1-15	0.83	0.816794	28.7	68.4	72.1	2.0004	200	40000	24	13	19	0	2015-08-22

## Sheet: REU 151007-3
Online Resource 3: Parameters of diffusion modelling					Timescales of magmatic processes during the eruptive cycle 2014-2015 at Piton de la Fournaise, La Réunion, obtained from Mg-Fe diffusion modelling in olivine												Diffusion modelling was done with the DIPRA software (Girona & Costa 2013)
					Contributions to Mineralogy and Petrology												Dx = spatial steps
					Caren Sundermeyer*, Andrea Di Muro, Boris Gordeychik, and Gerhard Wörner												Dt = time steps
					* Corresponding author: csunder@gwdg.de												Discrepancy = goodness of fit
																	Date of reactivation = Date of eruption - diffusion time
			Input parameters				Modelling parameters			Results							* min. diffusion time along c-axis
Crystal No.	Fo initial	Fo boundary		Angles to crystallographic axes		Dx	Iterations	Dt	Time	Uncertainty		Discrepancy	Date of
	mol	mol	a	b	c	micron		seconds	days	-	+		Reactivation
151007-3-6	0.844	0.82	8.6	87.9	81.6	3.00341	900	70000	471	137	143	2	2014-06-23
151007-3-7	0.8455	0.822	40.1	54.1	74.6	2.99038	700	70000	242	87	36	5	2015-02-07
151007-3-9	0.822	0.815	13.5	79.6	81.5	3	1000	70000	237	152	32	9	2015-02-12
151007-3-12	0.825	0.834	18	73.8	82.4	3.01408	1400	70000	617	325	127	0	2014-01-28
151007-3-14	0.829	0.82	51.7	50.9	62.2	3.01408	800	70000	337	77	85	10	2014-11-04

## Sheet: REU 151016-1
Online Resource 3: Parameters of diffusion modelling					Timescales of magmatic processes during the eruptive cycle 2014-2015 at Piton de la Fournaise, La Réunion, obtained from Mg-Fe diffusion modelling in olivine												Diffusion modelling was done with the DIPRA software (Girona & Costa 2013)
					Contributions to Mineralogy and Petrology												Dx = spatial steps
					Caren Sundermeyer*, Andrea Di Muro, Boris Gordeychik, and Gerhard Wörner												Dt = time steps
					* Corresponding author: csunder@gwdg.de												Discrepancy = goodness of fit
																	Date of reactivation = Date of eruption - diffusion time
			Input parameters				Modelling parameters			Results							* min. diffusion time along c-axis
Crystal No.	Fo initial	Fo boundary		Angles to crystallographic axes		Dx	Iterations	Dt	Time	Uncertainty		Discrepancy	Date of
	mol	mol	a	b	c	micron		seconds	days	-	+		Reactivation
151016-1-7	0.829	0.821	19.8	73.4	79.6	3.06944	1000	70000	563	133	162	5	2014-04-02
151016-1-8	0.83665	0.8242	88.4	2.3	88.3	1.97826	700	70000	298	129	254	0	2014-12-22
151016-1-14	0.806	0.8238	29.3	61.1	85.1	1.97297	900	70000	551	136	113	5	2014-04-13
151016-1-15	0.8455	0.8263	36.3	59.1	72.8	3.03077	1500	70000	680	153	300	8	2013-12-06

## Sheet: REU 151026-1a
Online Resource 3: Parameters of diffusion modelling					Timescales of magmatic processes during the eruptive cycle 2014-2015 at Piton de la Fournaise, La Réunion, obtained from Mg-Fe diffusion modelling in olivine												Diffusion modelling was done with the DIPRA software (Girona & Costa 2013)
					Contributions to Mineralogy and Petrology												Dx = spatial steps
					Caren Sundermeyer*, Andrea Di Muro, Boris Gordeychik, and Gerhard Wörner												Dt = time steps
					* Corresponding author: csunder@gwdg.de												Discrepancy = goodness of fit
																	Date of reactivation = Date of eruption - diffusion time
			Input parameters				Modelling parameters			Results							* min. diffusion time along c-axis
Crystal No.	Fo initial	Fo boundary		Angles to crystallographic axes		Dx	Iterations	Dt	Time	Uncertainty		Discrepancy	Date of
	mol	mol	a	b	c	micron		seconds	days	-	+		Reactivation
151026-1a-3	0.827	0.833	30.7	59.3	89.3	2	200	70000	41	19	39	0	2015-09-13
151026-1a-6	0.832	0.841	88.7	14	76	3	1000	70000	567	83	317	13	2014-04-05
151026-1a-7	0.85	0.8315	90	90	0	3.01331	500	40000	24	6	7	7	01.10.2015*
151026-1a-11	0.85	0.839	75.8	66.7	27.8	3.01205	200	40000	15	10	14	0	2015-10-09
151026-1a-13	0.8355	0.820026	0.7	89.3	89.9	3.02632	1200	70000	599	202	195	18	2014-03-04

## Sheet: REU 151031-1
Online Resource 3: Parameters of diffusion modelling					Timescales of magmatic processes during the eruptive cycle 2014-2015 at Piton de la Fournaise, La Réunion, obtained from Mg-Fe diffusion modelling in olivine												Diffusion modelling was done with the DIPRA software (Girona & Costa 2013)
					Contributions to Mineralogy and Petrology												Dx = spatial steps
					Caren Sundermeyer*, Andrea Di Muro, Boris Gordeychik, and Gerhard Wörner												Dt = time steps
					* Corresponding author: csunder@gwdg.de												Discrepancy = goodness of fit
																	Date of reactivation = Date of eruption - diffusion time
			Input parameters				Modelling parameters			Results							* min. diffusion time along c-axis
Crystal No.	Fo initial	Fo boundary		Angles to crystallographic axes		Dx	Iterations	Dt	Time	Uncertainty		Discrepancy	Date of
	mol	mol	a	b	c	micron		seconds	days	-	+		Reactivation
151031-1-1	0.7325	0.827988	33.8	59.9	76.1	3.99174	400	70000	93	15	16	32	2015-07-30
151031-1-2	0.851	0.830243	74.8	28.3	66.7	3.00312	700	70000	84	24	27	0	2015-08-08
151031-1-4	0.85	0.835	24.7	67.9	79.4	3.03226	700	70000	106	64	89	0	2015-08-17
151031-1-5	0.7812	0.8248	90	90	0	4.94	400	10000	29	4	4	35	03.10.2015*
151031-1-6	0.824	0.8447	87.7	3	88	2.94382	900	70000	272	66	122	6	2015-02-02
